# Supplementary material
Source: PubMed Central journal article supplement (PMC9454379)

S-Table -1: Study details for reported dosimetric correlates

| 1st author <sup>#</sup><br>inst, calc<br>algorithm<br>[Reference<br>#] | Lung<br>definition                                                                                               | #<br>dosimetri<br>cally<br>evaluable<br>treatments<br>/Total # pts | Median<br>Follow-up<br>(months)                                                             | Grading in<br>paper | % total with<br>G2+<br>RILT                                         | % total<br>with<br>G3+<br>RILT                                                        | Median (m)<br>or Mean (M)<br>Rx [range]                                                                                                                                           | ^ Median (m) or<br>Mean (M)<br>fractions [range]                                                                                                                                                  | Biological<br>Correction              | Significant D/V<br>variables or<br>cutpoints                                                                                                                                     | Comments                                                                                                               |
|------------------------------------------------------------------------|------------------------------------------------------------------------------------------------------------------|--------------------------------------------------------------------|---------------------------------------------------------------------------------------------|---------------------|---------------------------------------------------------------------|---------------------------------------------------------------------------------------|-----------------------------------------------------------------------------------------------------------------------------------------------------------------------------------|---------------------------------------------------------------------------------------------------------------------------------------------------------------------------------------------------|---------------------------------------|----------------------------------------------------------------------------------------------------------------------------------------------------------------------------------|------------------------------------------------------------------------------------------------------------------------|
| Allibhai <sup>S, P</sup><br>[25]                                       | Bilateral<br>lungs,<br>4DCT for<br>target<br>definition,<br>free-<br>breathing;<br>otherwise<br>not<br>specified | 185                                                                | 15.2 [6-<br>76]                                                                             | CTCAE3.0            | 17.9% of 52<br>pts with T2<br>tumors;<br>4.4% of 133<br>pts with T1 | 1.8 %<br>(none ><br>Grade 3)                                                          | Not enough<br>information to<br>determine.<br>Multiple<br>regimens<br>used: 50 Gy<br>in 10 fx, 60<br>Gy in 8, %0<br>Gy in 5, 52.5<br>Gy in 5, 48 in<br>4, 54 in 3, 60<br>Gy in 3) | Not enough<br>information to<br>determine.                                                                                                                                                        | N                                     | None found, though<br>V <sub>20</sub> , MLD<br>investigated.                                                                                                                     | Focus of paper is on effect of<br>GTV size. GTV and PTV<br>significantly correlated with<br>G2+ RP but not G3+ RP      |
| Bahio <sup>S, PB or<br/>CS</sup><br>[36]                               | Bilateral<br>lungs,<br>4DCT<br>Free-<br>breathing;<br>GTV<br>subtracted<br>following<br>STARS<br>trial           | 504 (28<br>with pre-<br>existing<br>ILD* <sup>^</sup> )            | 24 [2-49]                                                                                   | CTCAE3.0            | Not Stated                                                          | 4% of<br>total (1%<br>G5 RP) <sup>'</sup><br>32% in<br>ILD pts vs<br>2% in<br>non_ILD | 180 G (M)<br>[72-180]                                                                                                                                                             | Constraints<br>followed STARS<br>protocol: 50 GY/4<br>fx for central, 54<br>Gy/3 fx<br>peripheral. But<br>fraction numbers<br>likely differed<br>(reported BED<br>range 72-180 Gy <sub>10</sub> ) | LQ for Rx but<br>probably not<br>DVHs | V <sub>5</sub> 28% [21-42%]<br>with G3+ RP, 18%<br>[14-<br>22%] no G3+ RP<br>MLD 7 Gy [5-9 Gy]<br>with RP, 4 Gy [3-5<br>Gy] no RP                                                | Effect of ILD* <sup>^</sup> on RP incidence<br>highlighted; ILD highly<br>significant predictor of G3+ RP<br>(p=0.001) |
| Baker <sup>S, PB or<br/>CS</sup><br>[37]                               | Bilater<br>al<br>lungs,<br>4DCT;<br>Lungs_min<br>u s<br>iGTV <sup>^^^</sup>                                      | 236/263 (><br>6 m<br>followup)                                     | At least 6<br>m<br>Pts treated<br>multiple<br>times had<br>median FU<br>15.6 m [3-<br>58.7] | CTCAE3.0            | 12.3%                                                               | 1.3%                                                                                  | 50 Gy<br>(m)[40-60]                                                                                                                                                               | 5 (m)[4-8]                                                                                                                                                                                        | N                                     | Univariate: V <sub>5</sub> , V <sub>15</sub> ;<br>V <sub>prescription</sub> for Rx<br>dose=60 Gy; V <sub>20</sub><br>trend<br>No dosimetric<br>variable survived<br>multivariate | advised bilateral lung<br>V <sub>20</sub> <10%,MLD below 5-6 Gy                                                        |
| Barriger <sup>S</sup><br>None (70%), HND<br>(30%)<br>[38]              | Bilateral<br>lungs<br>minus<br>GTV                                                                               | 143/251                                                            | 17 [0.3-<br>89]                                                                             | CTC 2.0             | 9.2% of total<br>#, 10.5% of<br>those with<br>dosimetry             | 2.4% of<br>total<br>number,<br>2.1% of<br>those with<br>dosimetry                     | 60 Gy (m)<br>[24-72]* <sup>1</sup>                                                                                                                                                | 3 (m) [3-5]                                                                                                                                                                                       | N                                     | Univariate only:<br>median splits for<br>MLD, V <sub>20</sub>                                                                                                                    | ** Significant median splits:<br>MLD= 4 Gy<br>V <sub>20</sub> = 4%                                                     |

|                                     |                                                                                                           |                            |                                               |                                      |       |      |                                 |                                                                       |                               |                                                                                                                                                                                                                                                |                                                                                                                                                                                                                                                                                               |
|-------------------------------------|-----------------------------------------------------------------------------------------------------------|----------------------------|-----------------------------------------------|--------------------------------------|-------|------|---------------------------------|-----------------------------------------------------------------------|-------------------------------|------------------------------------------------------------------------------------------------------------------------------------------------------------------------------------------------------------------------------------------------|-----------------------------------------------------------------------------------------------------------------------------------------------------------------------------------------------------------------------------------------------------------------------------------------------|
| Borst <sup>S*, CS</sup> (2009) [26] | Bilateral lungs minus GTV                                                                                 | 175 /128*2                 | 16.1 m: all RP occurred within 6.2 m after tx | CTC 2.0 or SWOG                      | 10.9% | 0.8% | 48 Gy (m <sup>3</sup> )[25-60]  | 4 (m <sup>3</sup> ) [4-16]. Note 167 treatments were 4 or 8 fractions | Y (LQ, $\alpha/\beta = 3$ Gy) | Lyman Model <sup>&amp;</sup> on MLD2 (n=1)                                                                                                                                                                                                     | MLD is defined as the NTD (or EQD2) with $\alpha/\beta = 3$ Gy; This study found no significant difference between the MLD model parameters for SBRT and conventional fractionation.                                                                                                          |
| Borst <sup>S*, CS</sup> (2010) [39] | Same cohort as 2009                                                                                       | same cohort as Borst 2009  | same cohort as Borst 2009                     | CTC 2.0 or SWOG                      | 10.9% | 0.8% | 48 Gy (m <sup>3</sup> ) [25-60] | 4 (m <sup>3</sup> ) [4-16]. 167 treatments were 4 or 8 fractions      | Y (LQ and LQL)                | Lyman models <sup>&amp;</sup> on Mean NTD and V <sub>-NTD</sub> (NTD calculations using LQ and LQL) V <sub>-NTD</sub> model parameters given in Table 1 of citation                                                                            | Best fit $\alpha/\beta = 3$ Gy. LQ fit better than LQL, but LQL within the LQ model's 95% CI. See also Figure 3 of this report                                                                                                                                                                |
| Chang <sup>S, P</sup> (2012) [40]   | Bilateral lungs minus GTV*4 or treated lung minus GTV when ipsi metrics are evaluated; 4DCT for all plans | 130/130                    | 26 [6-78]                                     | CTCAE 3                              | 11.5% | 2.3% | 50 Gy (all)                     | 4 (all)                                                               | N                             | Dichotomized at median values: Univariate for MLD and V <sub>5</sub> -V <sub>40</sub> for bilateral lung and ipsi lung Multivariate: Ipsilateral MLD Multivariate with onset time included (Cox regression) : Ipsilateral V <sub>40</sub>      | MLD: Significant medians are 5.05 Gy (total lung, univariate) and 9.14 Gy (ipsi lung; uni and multivariable).<br><br>V <sub>dose</sub> : Significant medians for V <sub>5</sub> , <sub>40</sub> for total and ipsilateral lung (see Table 4 of reference and Figure 4 of this report)         |
| # Chang <sup>S, P</sup> (2014) [41] | Bilateral lungs minus GTV*4; 4DCT                                                                         | 100 (all central location) | 30.6 [9.4-92.6]                               | CTCAE3                               | 12%   | 1%   | 70 Gy (18 pts); 50 Gy (82 pts)  | 10 fx (18 pts); 4 fx (82 pts)                                         | N                             | For patients receiving 4 fractions - Univariate: Bilateral lung MLD, V <sub>5</sub> , V <sub>20</sub> ; Ipsilateral lung MLD, V <sub>10</sub> , V <sub>20</sub> Multivariate: Total lung MLD, V <sub>20</sub> Ipsilateral lung V <sub>30</sub> | && Significant cutpoints for the 4-fraction cases: Univariate whole lung: MLD=6 Gy; V <sub>5</sub> =30%, V <sub>20</sub> =12%. Univariate ipsi lung: MLD=10 Gy, V <sub>10</sub> =35%, V <sub>20</sub> =25%: Multivariate: Lung MLD=6 Gy, Lung V <sub>20</sub> =12%, ipsi V <sub>30</sub> =15% |
| Duncker-Rohr <sup>S, CS</sup> [42]  | Not stated but mean bilateral lung doses referenced                                                       | 45/39                      | 17                                            | CTCAE4 (acute) and RTOG/EORTC (late) | 10.2% | 0    | 35 Gy (m) [21-37.5]             | 5 (m) [3 or 5]                                                        | N                             | No formal dose-volume analysis but median bilateral MLD with symptomatic RP is 4.79 Gy, without RP is 3.01 Gy                                                                                                                                  |                                                                                                                                                                                                                                                                                               |
| Grills <sup>Mu, P</sup> [43]        | Bilateral lungs nn k ot GTV                                                                               | 505/483                    | 15.6 [1.2-87.6]                               | CTC Vn 3                             | 7%    | 2%   | 54 Gy (m)[11-64]                | 3 (m) [1-15]                                                          | Y for some variables          | ## V <sub>20</sub> ,MLD and BED3 investigated but were not significant                                                                                                                                                                         |                                                                                                                                                                                                                                                                                               |

|                                     |                                                                                              |                                    |            |                          |                                                            |                              |                                                        |                                                      |   |                                                                                                                                                                            |                                                                                                                                                                                                                                                              |
|-------------------------------------|----------------------------------------------------------------------------------------------|------------------------------------|------------|--------------------------|------------------------------------------------------------|------------------------------|--------------------------------------------------------|------------------------------------------------------|---|----------------------------------------------------------------------------------------------------------------------------------------------------------------------------|--------------------------------------------------------------------------------------------------------------------------------------------------------------------------------------------------------------------------------------------------------------|
| Guckenberger <sup>S, CS</sup> [44]  | Ipsilateral lung not CTV; 4DCT                                                               | 75/59                              | 13         | SWOG                     | 16%                                                        | 0                            | 37.5 Gy (m) [30-48]                                    | 3 (m) [1-8]                                          | Y | Probit model for Ipsilateral MLD2 ( $\alpha/\beta=3$ Gy)<br><br>Ipsilateral lung $V_{2.5}$ was $41.4\pm 8\%$ for patient with and $30.5\pm 13.8\%$ for patients without RP | Model parameters (95% CI) in reference: TD50=32.4 (20.3-85.5) Gy; $m=0.67$ (0.49-1.03). Also model parameters for NTCP probit model of $V_{2.5}$ : 50% value is 62.3 % (95% CI 49.9-84.1%) , $m=0.44$ (95% CI 0.31-0.66)<br><br>See Figure 3 of this report. |
| Hayashi <sup>S, E(Batho)</sup> [45] | Bilateral Lungs; subtraction not mentioned. Breath-hold (or 3 phases for target definition)  | 81                                 | 29 [5-84]  | CTCAE4                   | 11.1%                                                      | 2.5%                         | 48 Gy in 4 fx for 60 pts, 60 in 10 fx for 21 pts       | 4 (m) [Either 4 or 10]                               | N | Univariate: MLD split at 4.8 Gy, [range 2.9-6.9] $V_{20}$ split at 6.8% near significant on univariate, [range 3.7-11.1%]<br>Multivariate: MLD and $V_{20}$                | Median MLD Gr 0-1: 3.75<br>Median MLD Gr 2-3: 4.8<br>Median $V_{20}$ Gr 0-1: 5.1<br>Median $V_{20}$ Gr 2-3: 6.8<br>Age significant (older age worse)<br>Fractionation not significant                                                                        |
| Inoue <sup>S, NS</sup> [11]         | Bilateral lung (no subtraction mentioned); 4DCT                                              | 189/87<br>63 pts had multiple GTVs | Not stated | NCI-CTC                  | 16% at 1 yr;<br>30% at 2 yr (simple addition of KM curves) | 4% at 1 yr,<br>10% at 2 yr   | EQD2 88 Gy (m) with $\alpha/\beta=10$ Gy (EQD2 25-140) | 4 (m) [4-10]                                         | Y | No formal dose-volume analysis                                                                                                                                             | ^^ Only $V_{EQD2,20}$ examined; $\alpha/\beta$ and significance not stated. All tumors were metastatic<br>Quoted lung metrics are based on cumulative lung doses for treatment of all the patient's GTVs                                                     |
| Kimura <sup>S, P</sup> [12]         | Long scan or end-exhale. Bilateral lungs                                                     | 52/45 with >6 months follow-up     | 18 [6-56]  | CTCAE 3.0 and CT imaging | 46.8%                                                      | 6.4%                         | 60 Gy (m) [48-60]                                      | 8 (m) [4-14]                                         | N | Focus was CT changes for patients with/without emphysema. $V_{20}$ and dose/fraction correlation sought but not found                                                      |                                                                                                                                                                                                                                                              |
| Kundu <sup>S, E (NS)</sup> [17]     | free-breathing; $V_{dose}$ dosimetry on "lung not PTV"; MLD on 'air inflated parenchyma', so | 8/8                                | 18 [8-44]  | RTOG                     | 12.5%                                                      | 12.5% (1 pt, steroids, RTOG) | 48 Gy (all)                                            | 6 for 5 peripheral; targets; 8 for 3 central targets | N | Table of dose-volume metrics given but the RP case is not distinguished                                                                                                    |                                                                                                                                                                                                                                                              |

|                                    |                                                                                                            |       |                                                        |                                                                                      |            |                                                         |                                                |                                  |   |                                                                                                                                                                  |                                                                                                                                      |
|------------------------------------|------------------------------------------------------------------------------------------------------------|-------|--------------------------------------------------------|--------------------------------------------------------------------------------------|------------|---------------------------------------------------------|------------------------------------------------|----------------------------------|---|------------------------------------------------------------------------------------------------------------------------------------------------------------------|--------------------------------------------------------------------------------------------------------------------------------------|
|                                    | bilateral lungs'                                                                                           |       |                                                        |                                                                                      |            |                                                         |                                                |                                  |   |                                                                                                                                                                  |                                                                                                                                      |
| Li <sup>S,P</sup> [22]             | Not stated <sup>*4</sup> but probably bilateral lungs_not_GTV; 4DCT based on previous work from this group | 82/82 | 21.1 [12-80.1]                                         | Not stated but probably CTCAE 3 based on previous work from this group <sup>*4</sup> | 17%        | 2.4%                                                    | 70 Gy (all)                                    | 10 (all)                         | N | V <sub>40</sub> total lung on Univariate; no other D/V metrics ( looked at MLD, V <sub>10,20,30,40</sub> for total and ipsi lung); no D/V metric on Multivariate | Recommended MLD<9 Gy; V <sub>40</sub> <7% for total lung ; For V <sub>40</sub> , symptomatic RP was 12% below, 40% above.            |
| Matsuo <sup>Mu, E (AAA)</sup> [46] | Slow CT; bilateral lungs not PTV                                                                           | 74/74 | 31.4 [4.2-65]                                          | CTCAE3                                                                               | 20.3%      | 1.4%                                                    | 48 Gy (all)                                    | 4 (all)                          | N | Significant: V <sub>20</sub> , V <sub>25</sub><br>Trend: V <sub>10</sub> , V <sub>15</sub> , V <sub>30</sub> , V <sub>35</sub> , V <sub>40</sub>                 | V <sub>20</sub> =5.8% (G2+ RP below is 15%, 42.9% above))<br>V <sub>25</sub> =4.2% (G2+ RP below is 14.8%, 46.2% above)              |
| Ong <sup>S, E (AAA)</sup> [18]     | Average Intensity Projection; Bilateral lungs not PTV; ipsi lung not PTV                                   | 18/18 | 12.8                                                   | CTCAE 4                                                                              | 28%        | 11%                                                     | 60 Gy in 8 fx (10 pts) , 55 Gy in 5 fx (8 pts) | 8 fx (10 pts) and 5 fx (8 pts)   | N | Paper gives outcomes graph for total lung V <sub>5,10,15,20</sub> and MLD: also ipsi and contra V <sub>5</sub>                                                   | No RP observed for total lung V <sub>5</sub> below 37% and contralateral lung V <sub>5</sub> below 26%:: See Figure 3 in this report |
| Ohashi <sup>S, NS</sup> [47]       | Quiet breathing, lung definition not specified                                                             | 17/15 | Not stated but patients had pulmonary Fn tests at 1 yr | CTCAE2.0                                                                             | Not stated | 86.7% had 'no respirator symptoms of more than Grade 2' | 50 Gy (m) [40-60]                              | 5<br>2 had prior conventional RT | N | Focus on PFT changes (no dosimetric correlation here), no RILT analysis. Typo in description of V <sub>20</sub> vs RP                                            | Median V <sub>dose</sub> values given but not related to outcome                                                                     |

|                                      |                                                                                                  |         |                 |             |        |                                                      |                                                 |                          |                                       |                                                                                                                                                                                                                                                                                                                                                                                                                         |                                                                                                                 |
|--------------------------------------|--------------------------------------------------------------------------------------------------|---------|-----------------|-------------|--------|------------------------------------------------------|-------------------------------------------------|--------------------------|---------------------------------------|-------------------------------------------------------------------------------------------------------------------------------------------------------------------------------------------------------------------------------------------------------------------------------------------------------------------------------------------------------------------------------------------------------------------------|-----------------------------------------------------------------------------------------------------------------|
| Ricardi <sup>S, CC</sup><br>[48]     | Ipsilateral lung not CTV                                                                         | 63/60   | 30.9 [6.7-56.7] | RTOG        | 14.3%  | Grades 2 and 3 not separated; no higher Grade than 3 | 45 Gy in 3 fx for 58 tumors, 26Gy in 1 fx for 5 | 3 for 58 tumors, 1 for 5 | Y (LQ, EQD2 with $\alpha/\beta=3$ Gy) | Ipsilateral MLD2 statistically significant (t-test and logistic regression) to differentiate G2+ RP from non-symptomatic cases. Mean MLD2 for Grades 0-1 RP was 11.2 Gy (95% CI 10.1-12.3 Gy) and for 2-3 RP, mean MLD2 was 20.3 Gy (95% CI 16.6-223.9 Gy) Paper also presents two models using ipsilateral MLD2 : Lyman model with original LKB parameters and a logistic regression model (parameters given in paper) | See Section 6 and Figure 3 in this report for further discussion of models.                                     |
| Stauder <sup>S, E (ND)</sup><br>[49] | 4DCT for ITV definition; not otherwise described though values of MLD and Vdoses imply bilateral | 88/84   | 15.8 [2.5-28.6] | CTCAE3.0    | 12.5%; | 3.4 %                                                | 48 Gy (m) [32-60]                               | 4 (m) [3-5]              | N                                     | Investigated lung variables MLD, V <sub>20</sub> , V <sub>13</sub> , V <sub>10</sub> : none were significant. Only significant dose variable was PTV Dmax> 60 Gy                                                                                                                                                                                                                                                        |                                                                                                                 |
| Takeda <sup>Mu, CC</sup><br>[27]     | Slow CT; bilateral lungs (target subtraction not stated)                                         | 133/128 | 12 [6-45]       | CTCAE 3     | 21%    | 5%                                                   | 50 Gy (m) [3 dose groups: 40, 50, 60]           | 5 (all but 4 cases)      | N                                     | V <sub>5</sub> through V <sub>25</sub> and MLD distinguish G2 RP from G0-1 RP; V <sub>15-30</sub> distinguish G2 RP from G3 RP. No dosimetric or clinical factors distinguish G3 RP from G0-1 RP.                                                                                                                                                                                                                       | Curves (Fig 3 in reference) for 5% and 15% G2 RP risk vs V <sub>dose</sub> ; Risk<15% for V <sub>20</sub> <6.5% |
| Westover <sup>S</sup> [50]           | 30% phase of 4DCT; no other information                                                          | 20/15   | 24.1            | CTCAE V4.03 | 5%     | 5%                                                   | 45 Gy RBE (m) (42-50)                           | 3 for 17/20 tumors       | N                                     | None sought;                                                                                                                                                                                                                                                                                                                                                                                                            | Protons; 4 pts had prior RT Only lung toxicity is one G3 RP                                                     |

|                                   |                                                               |     |                     |          |            |                                         |             |         |   |                                                                                                                                                                                                                                   |
|-----------------------------------|---------------------------------------------------------------|-----|---------------------|----------|------------|-----------------------------------------|-------------|---------|---|-----------------------------------------------------------------------------------------------------------------------------------------------------------------------------------------------------------------------------------|
| Yamashita <sup>S</sup><br>CC [51] | Slow scan:<br>Bilateral<br>lungs, no<br>subtraction<br>stated | 117 | 14.7 [0.3-<br>76.2] | CTCAE3.0 | not stated | Not stated<br>(7.7 %<br>RILT 4 or<br>5) | 48 Gy (all) | 4 (all) | N | V <sub>20</sub> , MLD not<br>significant. Pre-<br>treatment Serum KL-<br>6, and Surfactant<br>Protein D (SP-D)<br>were significant<br>biomarkers; Pre-tx<br>Interstitial<br>Pneumonitis (IP) was<br>a significant risk<br>factor. |
|-----------------------------------|---------------------------------------------------------------|-----|---------------------|----------|------------|-----------------------------------------|-------------|---------|---|-----------------------------------------------------------------------------------------------------------------------------------------------------------------------------------------------------------------------------------|

Shaded studies contributed to Figure 4

Superscript S for single institution, Mu for 2 or more. When there are only two dose/fractionation groups they are separately listed  
Dose calculation algorithm: PB=pencil beam, P=Pinnacle, E=Eclipse (algorithm mentioned if described), CS=Convolution/superposition,

CC=Collapsed Cone, HND=inhomogeneity done but not described, NS=not stated whether inhomogeneity correction done

Note: Many studies used 4DCT for target definition but how or if this was used for OAR definition is seldom stated.

\*^: ILD is Interstitial Lung Disease.

^^: iGTV is union of GTVs from 4DCT or at minimum end-inhale, end-exhale and planning scan

\*1: Only a wide range of doses specified for 13% patients

\*\* : Significant Splits: G2+ RILT was 4.3% if MLD<4 Gy, 17.6% if MLD>4 Gy. G2+ RILT was 4.3% if V<sub>20</sub><4%, 16.4% if

>4% S\* : All hypofractionated patients treated at one institution, conventionally fractionated at another

\*2 : 95 pts had one target. 20 patients had multiple sites treated with a single treatment plan (42 targets). 13 patients had 2 or more treatments delivered with different plans, separated by 0 to > 13 months (38 targets). Evaluation was done for the summed plans

\*3: Median over all treatments (details in tables 1-3 of citation). Single lesion case doses ranged from 35-60 Gy in 4 or 8 fractions.

& : Mean NTD (EQD2) from LQ with  $\alpha/\beta=3$  Gy (TD50=19.6 Gy, m=0.43); RP incidence was compared with n=1 Lyman model for conventionally fractionated series

\*4: Lung definition is bilateral lungs-GTV.

#: Chang 2012 has only 11 central lesions; Chang 2014 is 100 central lesions; these studies share few (if any) patients.

&&: Incidence of G2+ RP almost 2 times higher if bronchial tree Dmax>38 Gy, V<sub>35</sub>>1cc.

##: How BED3 was applied was not described

^^: V<sub>20</sub>≤30% was suggested; 30% is large compared to the other reviewed report

**S-Table-2a: Radiation induced lung toxicity grading systems [45]**

| System                        | Grade 1                                                                      | Grade 2                                                                                                           | Grade 3                                                                                                                                                                                      | Grade 4                                                                                  |
|-------------------------------|------------------------------------------------------------------------------|-------------------------------------------------------------------------------------------------------------------|----------------------------------------------------------------------------------------------------------------------------------------------------------------------------------------------|------------------------------------------------------------------------------------------|
| RTOG/EORTC<br>Acute Lung      | Mild symptoms of dry cough or dyspnea on exertion                            | Persistent cough requiring narcotic, antitussive agents / dyspnea with minimal effort but not at rest             | Severe cough unresponsive to narcotic antitussive agent or dyspnea at rest / clinical or radiological evidence of acute pneumonitis / intermittent oxygen or <b>steroids</b> may be required | Severe respiratory insufficiency / continuous oxygen or assisted ventilation             |
| RTOG/EORTC<br>Late Lung       | Asymptomatic or mild symptoms (dry cough)<br>Slight radiographic appearances | Moderate symptomatic fibrosis or pneumonitis (severe cough)<br>Low grade fever<br>Patchy radiographic appearances | Severe symptomatic fibrosis or pneumonitis<br>Dense radiographic changes                                                                                                                     | Severe respiratory insufficiency/<br>Continuous O <sub>2</sub> /<br>Assisted ventilation |
| SWOG<br>Acute Lung            | Radiographic changes; Symptoms do not require steroid                        | Radiographic changes; require <b>steroid</b> , or tap of effusion                                                 | Radiographic changes; require oxygen                                                                                                                                                         | Radiographic changes; require assisted ventilation                                       |
| SWOG<br>Late Lung<br>Fibrosis | Radiographic changes; No symptoms                                            | Not specified                                                                                                     | Radiographic changes; with symptoms (also code the symptoms)                                                                                                                                 | Not Specified                                                                            |

|                                                                                                                                                                                                                         |                                                                                                                                                                            |                                                                                                                                       |                                                                                                                                                        |                                                                                                                                                                                                                    |
|-------------------------------------------------------------------------------------------------------------------------------------------------------------------------------------------------------------------------|----------------------------------------------------------------------------------------------------------------------------------------------------------------------------|---------------------------------------------------------------------------------------------------------------------------------------|--------------------------------------------------------------------------------------------------------------------------------------------------------|--------------------------------------------------------------------------------------------------------------------------------------------------------------------------------------------------------------------|
| CTCAE 3.0<br>Pneumonitis/<br>Infiltrates                                                                                                                                                                                | Asymptomatic,<br>radiographic findings<br>only                                                                                                                             | Symptomatic, not<br>interfering with ADL                                                                                              | Symptomatic, interfering<br>with ADL, Oxygen<br>indicated                                                                                              | Life-threatening,<br>ventilatory support<br>indicated                                                                                                                                                              |
| CTCAE3.0<br>Pulmonary fibrosis<br>(radiographic changes)                                                                                                                                                                | Minimal radiographic<br>findings (or patchy or<br>bi- basilar changes)<br>with estimated<br>radiographic<br>proportion of total<br>lung volume that is<br>fibrotic of <25% | Patchy or bi-basilar<br>changes with estimated<br>radiographic proportion<br>of total lung volume<br>that is fibrotic of 25 –<br><50% | Dense or widespread<br>infiltrates/consolidation with<br>estimated radiographic<br>proportion of total lung<br>volume that is fibrotic of 50<br>– <75% | Estimated radiographic<br>proportion of total lung<br>volume that is fibrotic is<br>≥75%; honeycombing                                                                                                             |
| CTCAE 4.03<br>Pneumonitis (A disorder<br>characterized by<br>inflammation focally or<br>diffusely affecting the<br>lung parenchyma )                                                                                    | Asymptomatic;<br>clinical or diagnostic<br>observations only;<br>Intervention not<br>indicated                                                                             | Symptomatic; medical<br>intervention indicated;<br>limiting instrumental<br>ADL                                                       | Severe symptoms; limiting<br>self care ADL; oxygen<br>indicated                                                                                        | Life-threatening<br>respiratory compromise;<br>urgent intervention<br>indicated (e.g.,<br>tracheotomy or<br>intubation)                                                                                            |
| CTCAE 4.03 Pulmonary<br>fibrosis (A disorder<br>characterized by the<br>replacement of the lung<br>tissue by connective<br>tissue, leading to<br>progressive dyspnea,<br>respiratory failure or<br>right heart failure) | Mild hypoxemia;<br>radiologic pulmonary<br>fibrosis <25% of lung<br>volume                                                                                                 | Moderate hypoxemia;<br>evidence of pulmonary<br>hypertension;<br>radiographic pulmonary<br>fibrosis 25 - 50%                          | Severe hypoxemia; evidence<br>of right-sided heart failure;<br>radiographic pulmonary<br>fibrosis >50 - 75%                                            | Life-threatening<br>consequences (e.g.,<br>hemodynamic/pulmonary<br>complications);<br>intubation with<br>ventilatory support<br>indicated; radiographic<br>pulmonary fibrosis >75%<br>with severe<br>honeycombing |

All: Grade 0=no symptoms, Grade 5=toxicity directly related to death



S-Table-2b: RTOG-EORTC Lent Soma Scale [46]

|                                              | GRADE 1                                                             | GRADE 2                                                               | GRADE 3                                                               | GRADE 4                                                           | SCORING                                         |
|----------------------------------------------|---------------------------------------------------------------------|-----------------------------------------------------------------------|-----------------------------------------------------------------------|-------------------------------------------------------------------|-------------------------------------------------|
| <b>Subjective</b>                            |                                                                     |                                                                       |                                                                       |                                                                   |                                                 |
| Cough                                        | Occasional                                                          | Intermittent                                                          | Persistent                                                            | Refractory                                                        | — <b>Instructions</b>                           |
| Dyspnea                                      | Breathless on intense exertion                                      | Breathless on mild exertion                                           | Breathless at rest, limits all activities                             | Prevents any physical activity                                    | — <b>Score the 8</b>                            |
| Chest pain/discomfort                        | Occasional & minimal                                                | Intermittent & tolerable                                              | Persistent & intense                                                  | Refractory & excruciating                                         | — <b>SOM</b>                                    |
|                                              |                                                                     |                                                                       |                                                                       |                                                                   | — <b>parameters</b>                             |
|                                              |                                                                     |                                                                       |                                                                       |                                                                   | — <b>with 1 - 4</b>                             |
| <b>Objective</b>                             |                                                                     |                                                                       |                                                                       |                                                                   |                                                 |
| Pulmonary fibrosis                           | Radiological abnormality                                            | Patchy dense abnormalities on radiograph                              | Dense confluent radiographic changes limited to radiation field       | Dense fibrosis, severe scarring & major retraction of normal lung | — <b>(Score = 0 if there are no toxicities)</b> |
| Lung function                                | 10% - 25% reduction of respiration volume and/or diffusion capacity | > 25% - 50% reduction of respiration volume and/or diffusion capacity | > 50% - 75% reduction of respiration volume and/or diffusion capacity | > 75% reduction of respiration volume and/or diffusion capacity   | — <b>Total the scores and divide by 8</b>       |
|                                              |                                                                     |                                                                       |                                                                       |                                                                   |                                                 |
| <b>Management</b>                            |                                                                     |                                                                       |                                                                       |                                                                   |                                                 |
| Pain                                         | Occasional non-narcotic                                             | Regular non-narcotic                                                  | Regular narcotic                                                      | Surgical intervention                                             | — <b>LENT Score:</b>                            |
| Cough                                        |                                                                     | Non-narcotic                                                          | Narcotic, intermittent corticosteroids                                | Respirator, continuous corticosteroids                            | — _____                                         |
| Dyspnea                                      |                                                                     | Occasional O <sub>2</sub>                                             | Continuous O <sub>2</sub>                                             |                                                                   | — _____                                         |
|                                              |                                                                     |                                                                       |                                                                       |                                                                   |                                                 |
| <b>Analytic</b>                              |                                                                     |                                                                       |                                                                       |                                                                   |                                                 |
| PFT                                          | Decrease to >75% - 90% of preTx value                               | Decrease to >50% - 75% of preTx value                                 | Decrease to >25% - 50% of preTx value                                 | Decrease to ≤ 25% of preTx value                                  | Y/N Date:                                       |
| DLCO                                         | Decrease to >75% - 90% of preTx value                               | Decrease to >50% - 75% of preTx value                                 | Decrease to >25% - 50% of preTx value                                 | Decrease to ≤ 25% of preTx value                                  | Y/N Date:                                       |
| % O <sub>2</sub> /CO <sub>2</sub> saturation | > 70% O <sub>2</sub> , ≤ 50% CO <sub>2</sub>                        | > 60% O <sub>2</sub> , ≤ 60% CO <sub>2</sub>                          | > 50% O <sub>2</sub> , ≤ 70% CO <sub>2</sub>                          | ≤50% O <sub>2</sub> , >70% CO <sub>2</sub>                        | Y/N Date:                                       |
| CT/ MRI                                      | Assessment of lung volume and zones of fibrosis                     |                                                                       |                                                                       |                                                                   | Y/N Date:                                       |
| Perfusion scan                               | Assessment of pulmonary blood flow and alveolar filling             |                                                                       |                                                                       |                                                                   | Y/N Date:                                       |
| Lung lavage                                  | Assessment of cells and cytokines                                   |                                                                       |                                                                       |                                                                   | Y/N Date:                                       |

S-Table-3: Dose constraints of lung from individual NRG/RTOG trials

|                        | Number of Fractions | Structure    | Constraint (no deviation)             | Comments                                        |
|------------------------|---------------------|--------------|---------------------------------------|-------------------------------------------------|
| RTOG 0813              | 5                   | Lung_not_GTV | D_1500cc <= 12.5 Gy                   | Dose calculation algorithm must be credentialed |
|                        |                     |              | D_1000 cc<=13.5 Gy                    |                                                 |
| RTOG 0915              | 1                   | Lung_not_GTV | D_1500 cc <=7 Gy                      | Dose calculation algorithm must be credentialed |
|                        |                     |              | D_1000 cc <=7.4 Gy                    |                                                 |
|                        | 4                   |              | D_1500 cc <=11.6 Gy                   |                                                 |
|                        |                     |              | D_1000 cc <=12.4 Gy                   |                                                 |
| RTOG 0618              | 3                   | Lung_not_GTV | %V20<=10% (minor deviation up to 15%) | No inhomogeneity correction                     |
| RTOG 0236              | 3                   | Lung_not_GTV | %V20<=10% (minor deviation up to 15%) | No inhomogeneity correction                     |
| RTOG 1021/ACOSOG Z4099 | 3                   | Lung_not_GTV | %V20<=10% (minor deviation up to 15%) | Acceptable Inhomogeneity corrections specified  |
|                        |                     |              | D_1500 cc<=10.5 Gy                    |                                                 |
|                        |                     |              | D_1000 cc <=11.4 Gy                   |                                                 |

Supplemental Figure 1: Lung dose volume effect on lung toxicity. Plot shows the 2Gy-per-fraction equivalent dose (EQD2)

Instead of physical dose in Figure 4a for x-axis

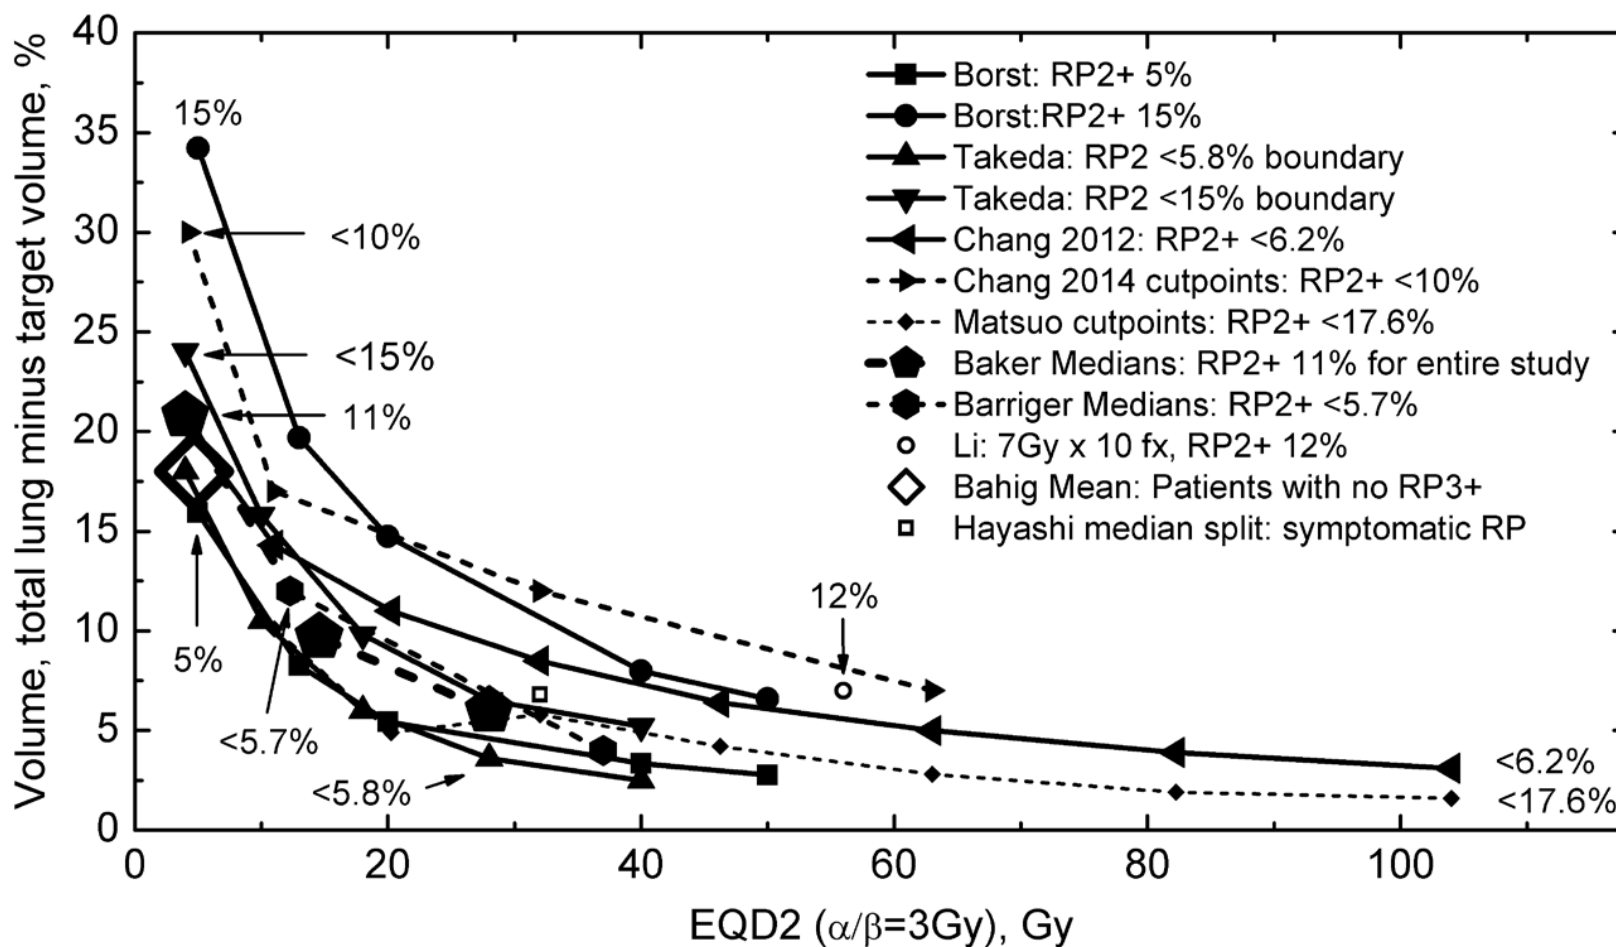

Supplement: NIHMS1830323-supplement-1.pdf [file NIHMS1830323-supplement-1.pdf]
